# Supplementary material for: Suppressing Nonspecific Binding in Biolayer Interferometry Experiments for Weak Ligand–Analyte Interactions
Source: PubMed Central journal article supplement — ACS Omega. 2022 Mar 9;7(11):9206–11. doi: 10.1021/acsomega.1c05659 (PMC8945191; doi:10.1021/acsomega.1c05659), 2022-03-09
Supplement: ao1c05659_si_001.pdf [file ao1c05659_si_001.pdf]

## Supporting Information

Suppressing nonspecific binding in biolayer interferometry experiments for weak ligand-analyte interactions

*Alyssa Dubrow<sup>1</sup>, Bryan Zuniga<sup>1</sup>, Elias Topo<sup>1</sup>, and Jae-Hyun Cho<sup>1,\*</sup>*

Department of Biochemistry and Biophysics, Texas A&M University, College Station, TX 77843, United States

\*Corresponding author. Email: [jaehyun.cho@agnet.tamu.edu](mailto:jaehyun.cho@agnet.tamu.edu)

Figures S1 – S7.

Figure S1

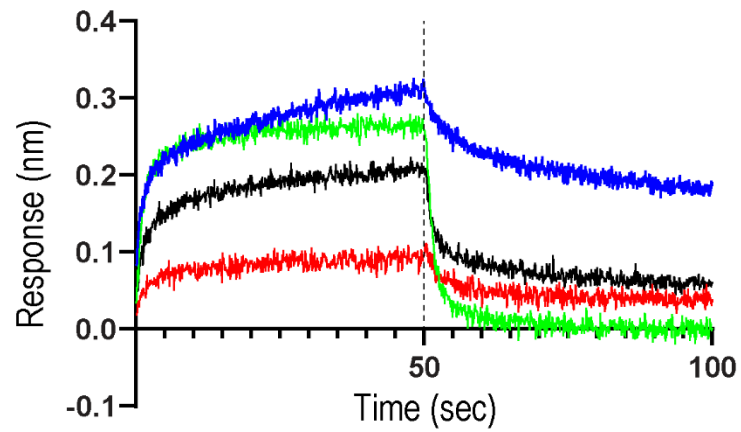

**Figure S1.** Superimposed BLI sensorgram showing NSB of p85 $\beta$  (40  $\mu$ M) in the presence of 50mM imidazole (blue), 0.6 M trehalose (green), 0.6 M sucrose (red), and 0.6 M glucose (black). All buffers also contained 1% BSA.

Figure S2

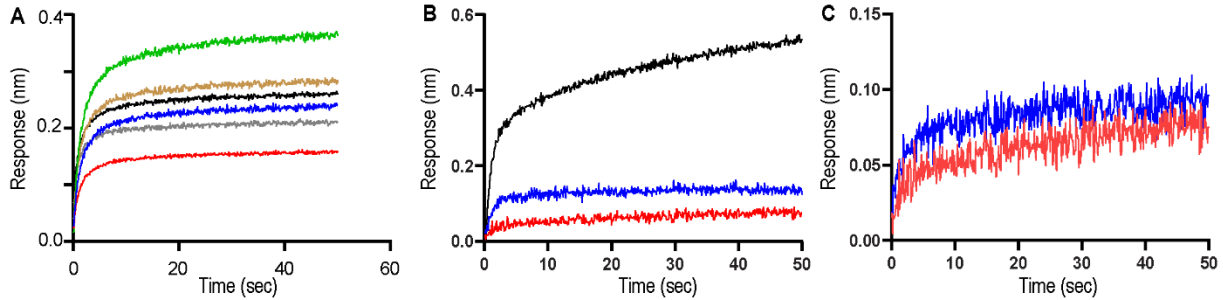

**Figure S2.** (A) Superimposed sensorgrams of NSB in the presence of 0.6 M sucrose (blue), 0.6 M sucrose, 20 mM imidazole (red), 0.6 M trehalose (green), 0.6 M trehalose and 20 mM imidazole (brown), 0.6 M glucose (black), 0.6 M glucose and 20 mM imidazole (gray). (B) Superimposed sensorgram of NSB in the presence of 1% BSA and 20 mM imidazole (black), 0.6 M sucrose, and 20 mM imidazole (blue), and of 1% BSA, 0.6 M sucrose, and 20mM imidazole (red). (C) Superimposed sensorgram of NSB in the presence of 1% BSA and 0.6 M sucrose (blue) and 1% BSA, 0.6 M sucrose, and 20mM imidazole (red). p85 $\beta$  (40  $\mu$ M) is used to monitor NSB.

Figure S3

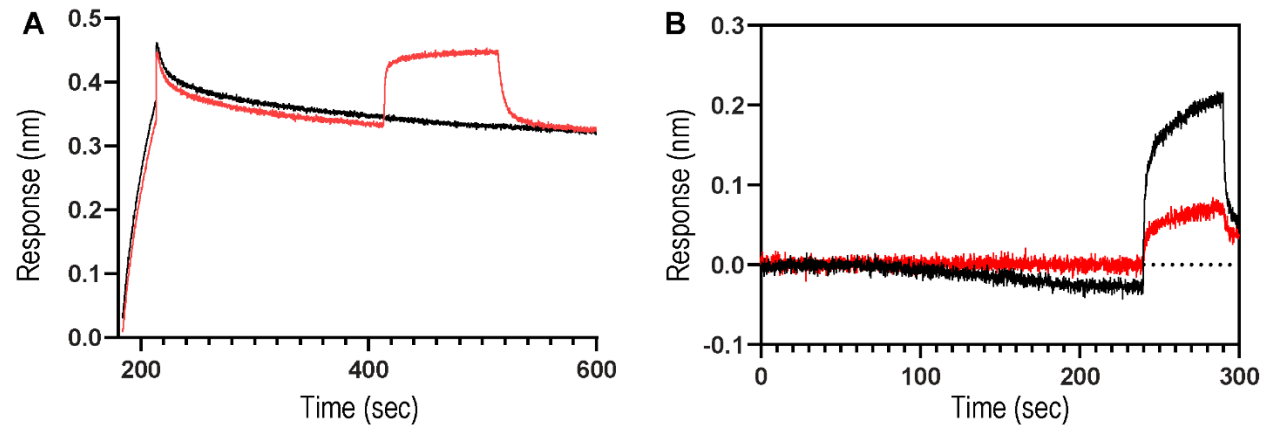

**Figure S3.** (A) Raw sensorgram showing the interaction between NS1(ligand) and 40 μM (red) p85β (analyte) in the presence of 1% BSA, 0.6 M sucrose, and 20mM imidazole. Reference data (0 μM p85β) is shown in black. (B) Raw sensorgram showing NSB of 40 μM p85β in the presence of 1% BSA (black) and in the presence of 1% BSA, 0.6 M sucrose, and 20mM imidazole (red).

Figure S4

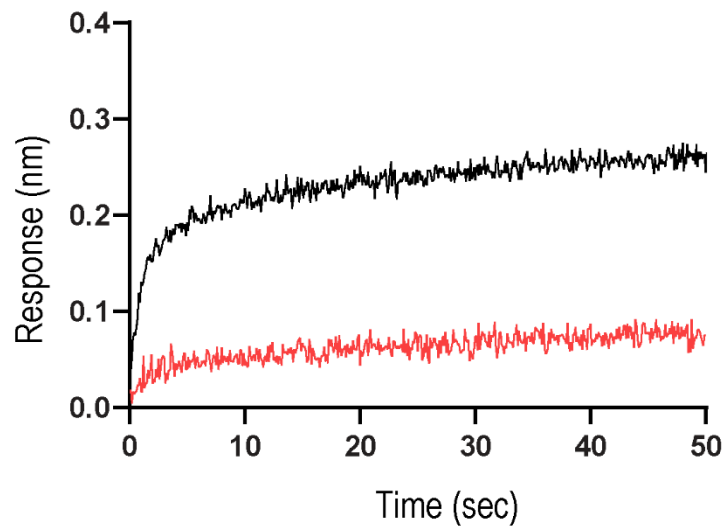

**Figure S4.** BLI sensorgram of NSB (40  $\mu$ M p85 $\beta$ ) in the presence of 0.1% BSA and 0.005% Tween (black) and 1% BSA, 0.6 M sucrose, and 20 mM imidazole (red).

Figure S5

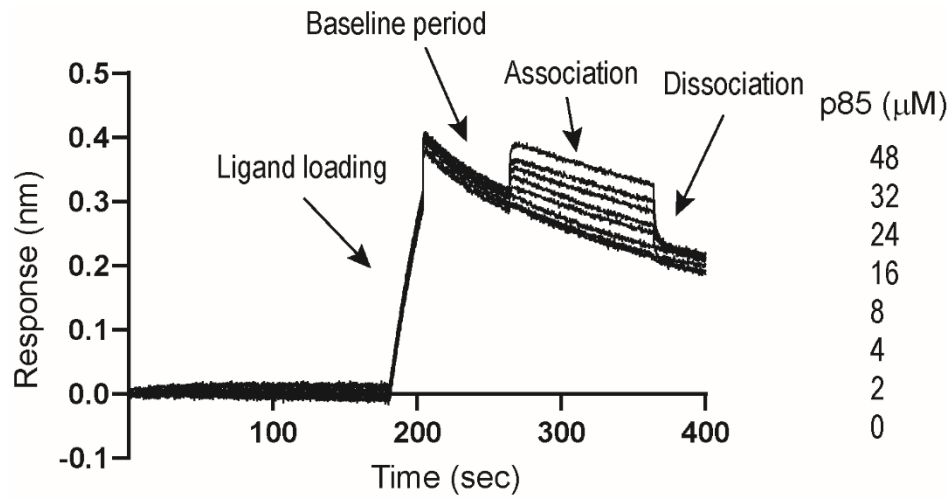

**Figure S5.** Raw sensorgram of the NS1-p85 interaction showing the process from the ligand (NS1) capture to the dissociation step in the presence of 50mM imidazole and 1% BSA.

Figure S6

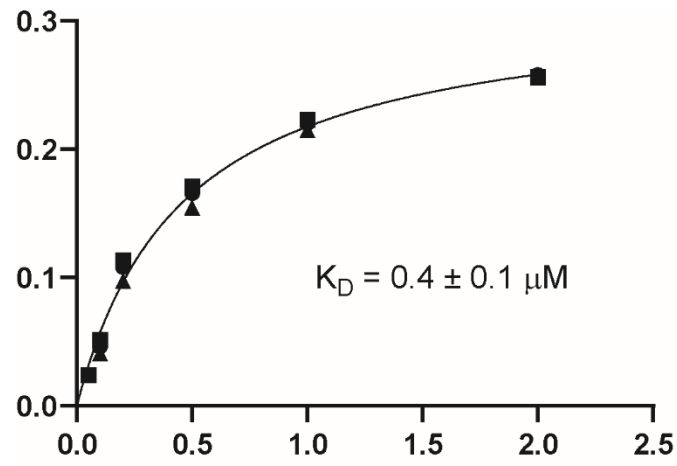

**Figure S6.** Binding isotherm of wild-type NS1 and p85 $\beta$  in the presence of 1% BSA, 0.6 M sucrose, and 20mM imidazole.

Figure S7

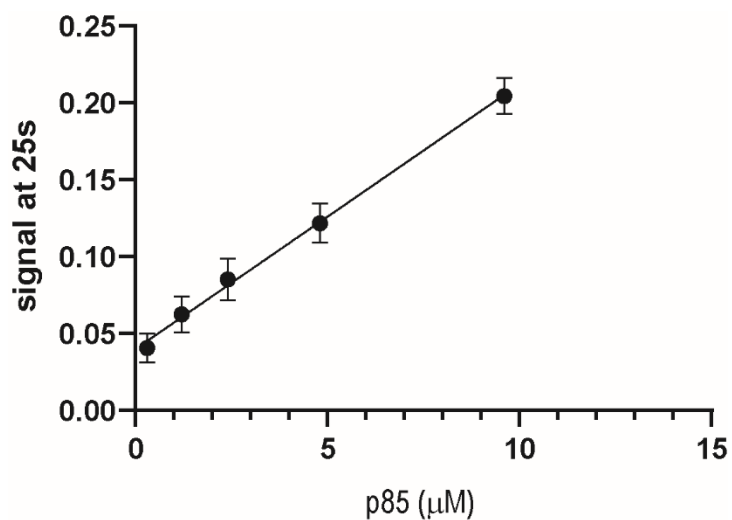

**Figure S7.** Estimation of limit of detection (LOD) and limit of quantitation (LOQ) for binding of p85 to NS1. LOD ( $3.3\sigma/slope$ ) and LOQ ( $10\sigma/slope$ ) were estimated to be 1.48  $\mu\text{M}$  and 4.48  $\mu\text{M}$ , respectively.  $\sigma$  and slope are the standard deviation of the response and the slope of the curve, respectively.
